# Supplementary material
Source: publisher figshare collection journal article supplement (https://sage.figshare.com/ndownloader/files/18811283)
Supplement: Supplementary file 1 [file 18811283]

Supplementary Table 5.

*PCP burnout and associated outcomes*

| Outcomes                                     | Association with PCP burnout |
|----------------------------------------------|------------------------------|
| Lower quality of patient care                | *                            |
| Medical errors                               | *                            |
| Lower job satisfaction                       | Y                            |
| High job stress                              | Y                            |
| PCPs leaving the practice (i.e., turnover)   | Y                            |
| Lower patient satisfaction                   | N                            |
| Antibiotic prescribing for patients with ARI | N                            |

Note. “Y” yes, associated with PCP burnout; “\*” mixed whether there is an association with PCP burnout; “N” not associated with PCP burnout; PCP = primary care provider; ARI = Acute respiratory infections;
